# Supplementary material for: Bacterial Cellulose Hybrid Composites with Calcium Phosphate for Bone Tissue Regeneration
Source: MDPI journal article supplement (doi:10.3390/ijms232416180), 2022-12-19
Supplement: s1 [file s1]

Supplementary Material- Bacterial cellulose hybrid composites with calcium phosphate for bone tissue regeneration

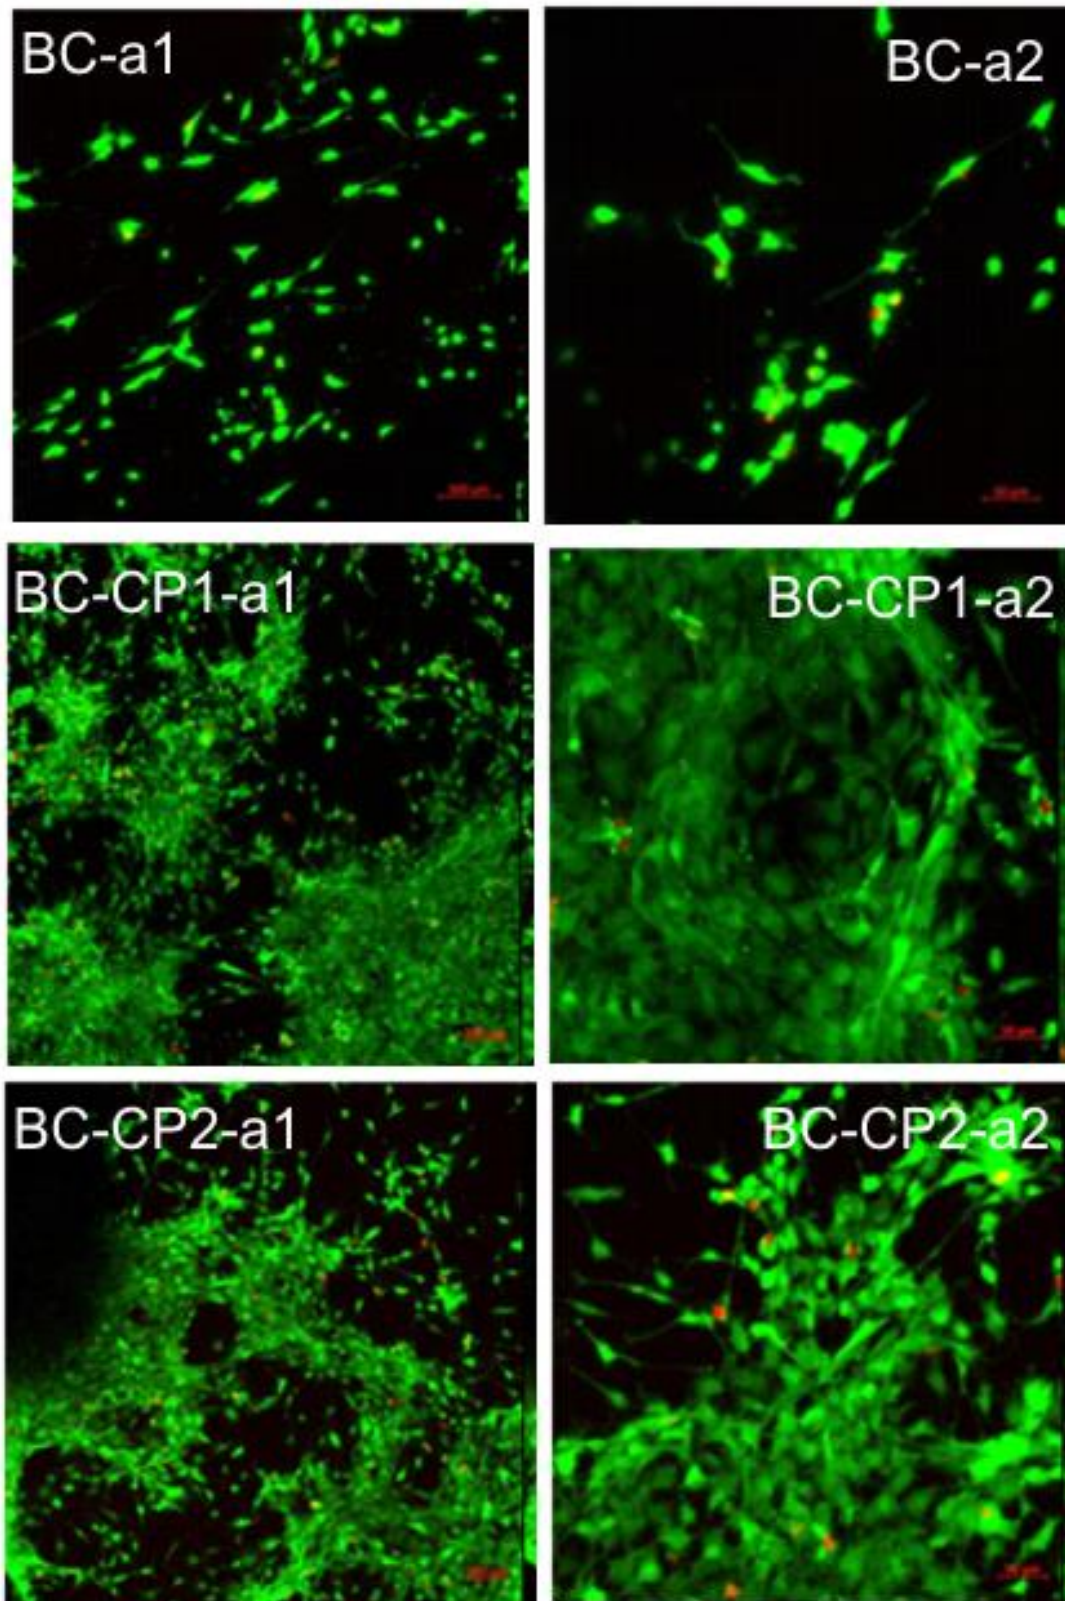

Figure S1. Fluorescence microscopy images at different magnifications: a1 (100 $\mu$ m) and a2 (50 $\mu$ m) of the adherent cells on BC, BC-CP1 and BC-CP2 samples after 3 days.

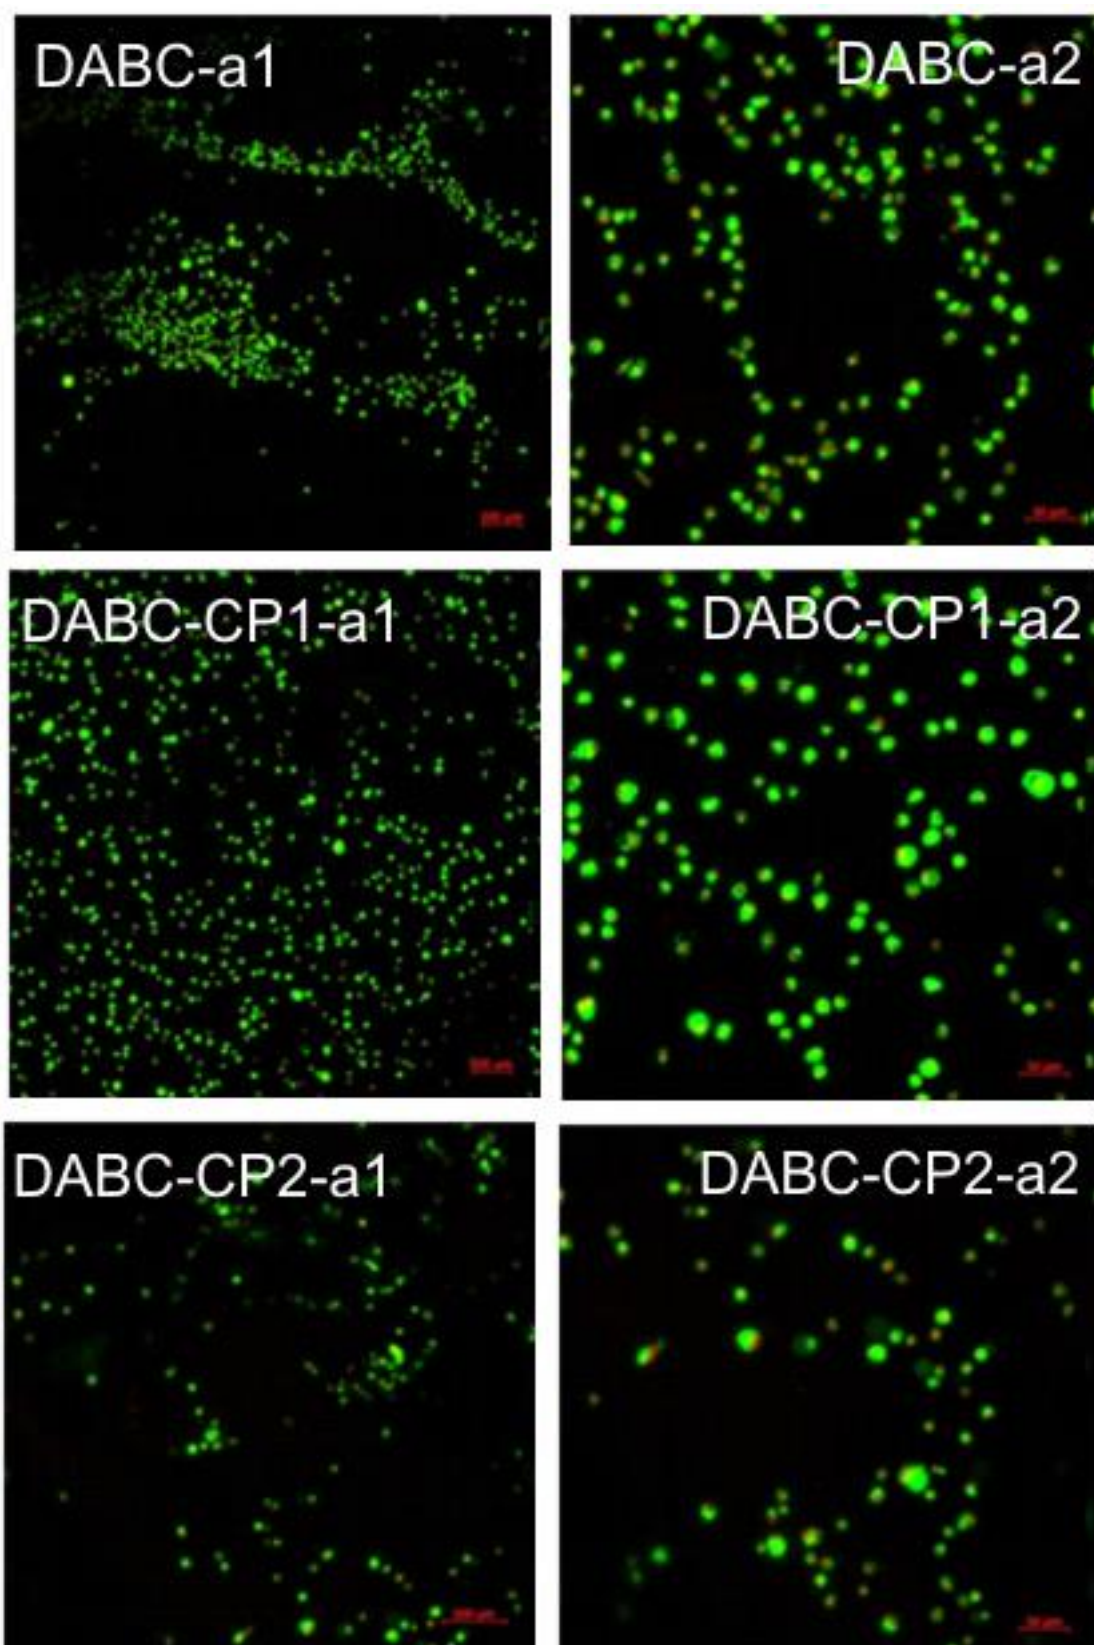

Figure S2. Fluorescence microscopy images at different magnifications: a1 (100μm) and a2 (50μm) of the adherent cells on DABC, DABC-CP1 and DABC-CP2 samples after 3 days.



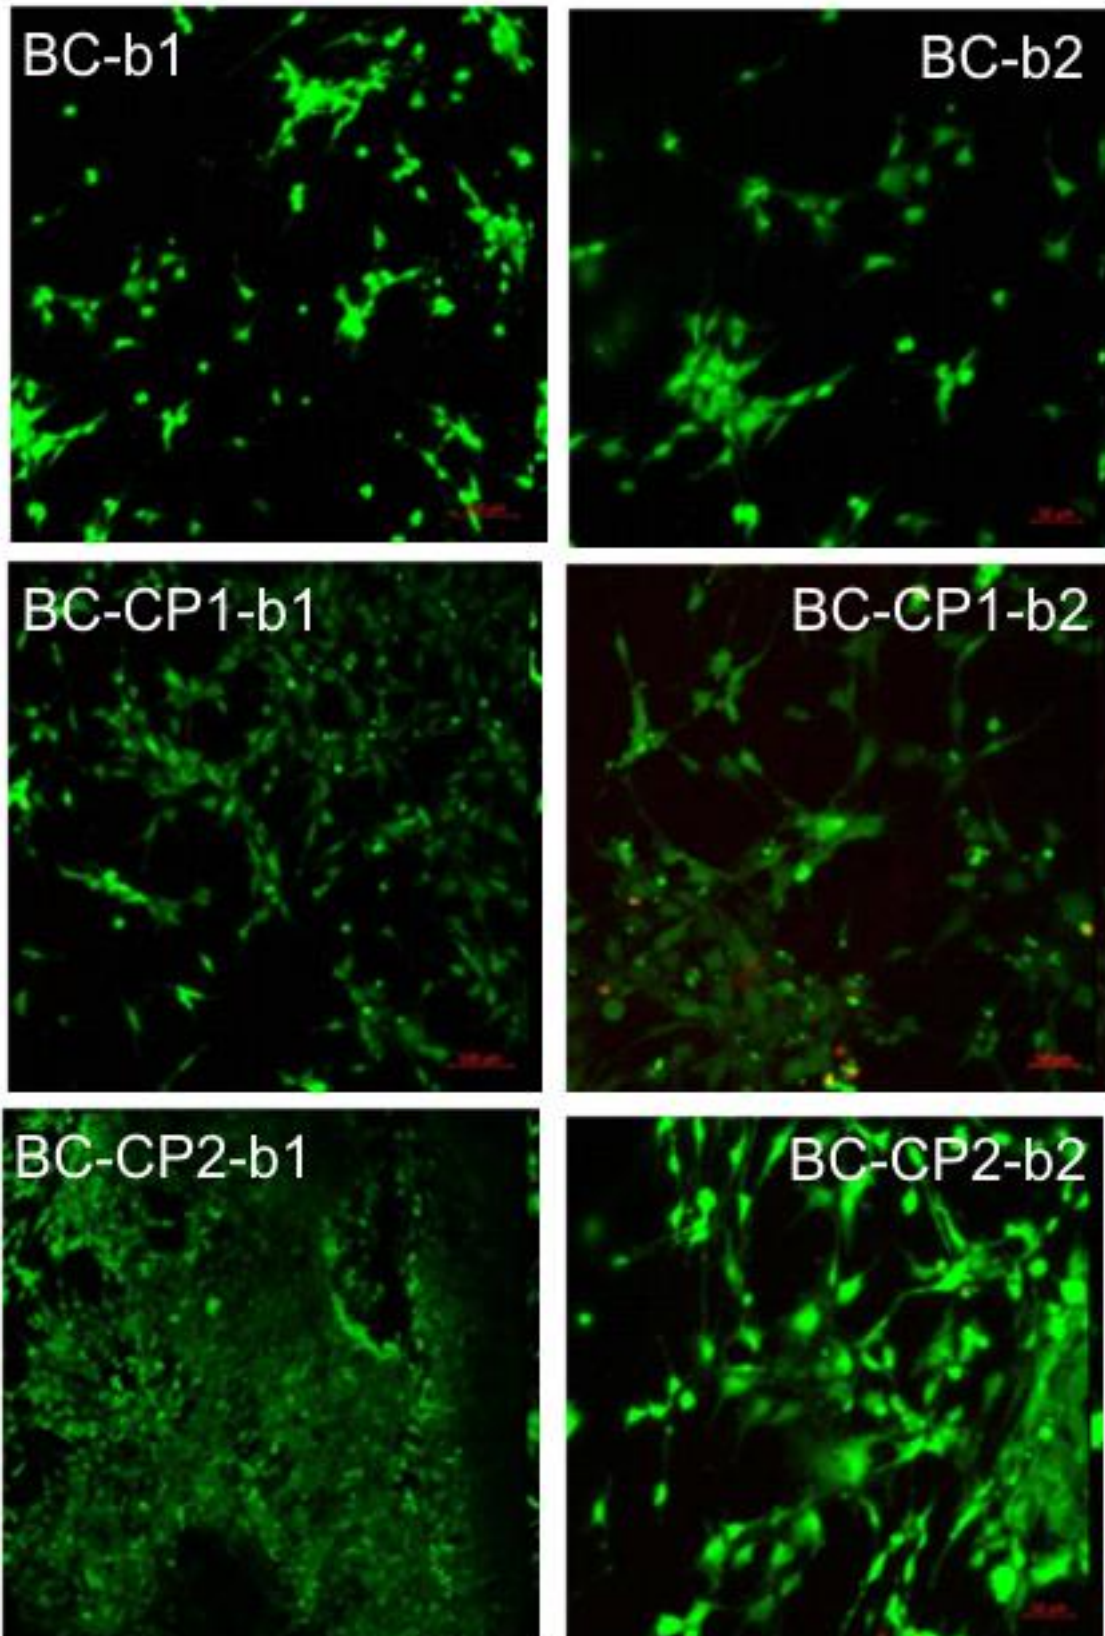

Figure S3. Fluorescence microscopy images at different magnifications: b1 (100μm) and b2 (50μm) of the adherent cells on BC, BC-CP1 and BC-CP2 samples after 7 days.

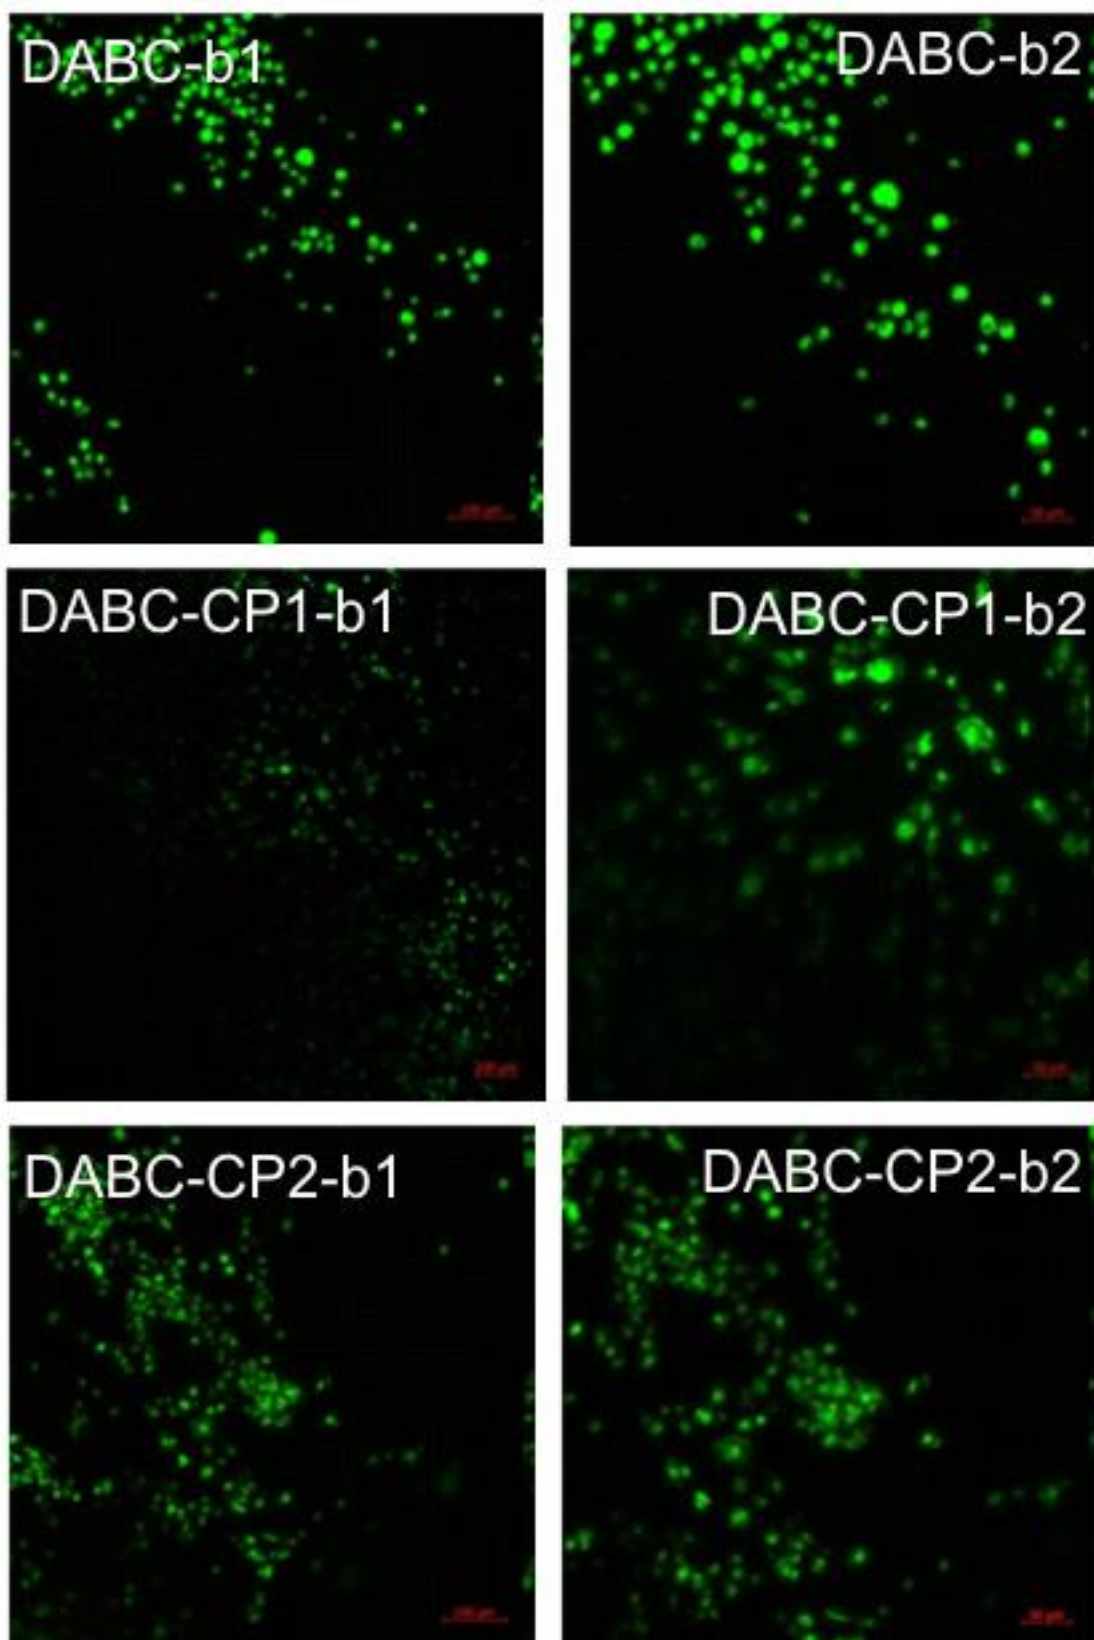

Figure S4. Fluorescence microscopy images at different magnifications: b1 (100μm) and b2 (50μm) of the adherent cells on DABC, DABC-CP1 and DABC-CP2 samples after 7 days.
